# Supplementary material for: Low Solar Absorptance, High Emittance Performance Thermochromic VO2-Based Smart Radiator Device
Source: MDPI journal article supplement (doi:10.3390/nano12244422), 2022-12-11
Supplement: s1 [file s1]

# Low Solar Absorptance, High Emittance Performance Thermochromic VO<sub>2</sub>-Based Smart Radiator Device

Ali Hendaoui

Physics Department, College of Science and General Studies, Alfaisal University,  
P.O. Box 50927, Riyadh 11533, Saudi Arabia; ahendaoui@alfaisal.edu

## Determination of the deposition rate of a-Si, SiO<sub>2</sub>, and VO<sub>2</sub>

### Amorphous silicon (a-Si):

Plasmlab system 100 PECVD (Plasma Enhanced Chemical Vapor Deposition) from Oxford Instruments was used to deposit a-Si layer using a gas mixture of SiH<sub>4</sub> and Ar using a pre-established recipe in the system for low-rate deposition. The substrate temperature is 350°C. Figure S3 represents the cross-section image of a layer deposited for 20 minutes on a quartz substrate. A thickness of about 540 nm is obtained. This corresponds to a deposition rate of approximately 0.45 nm/s for a-Si.

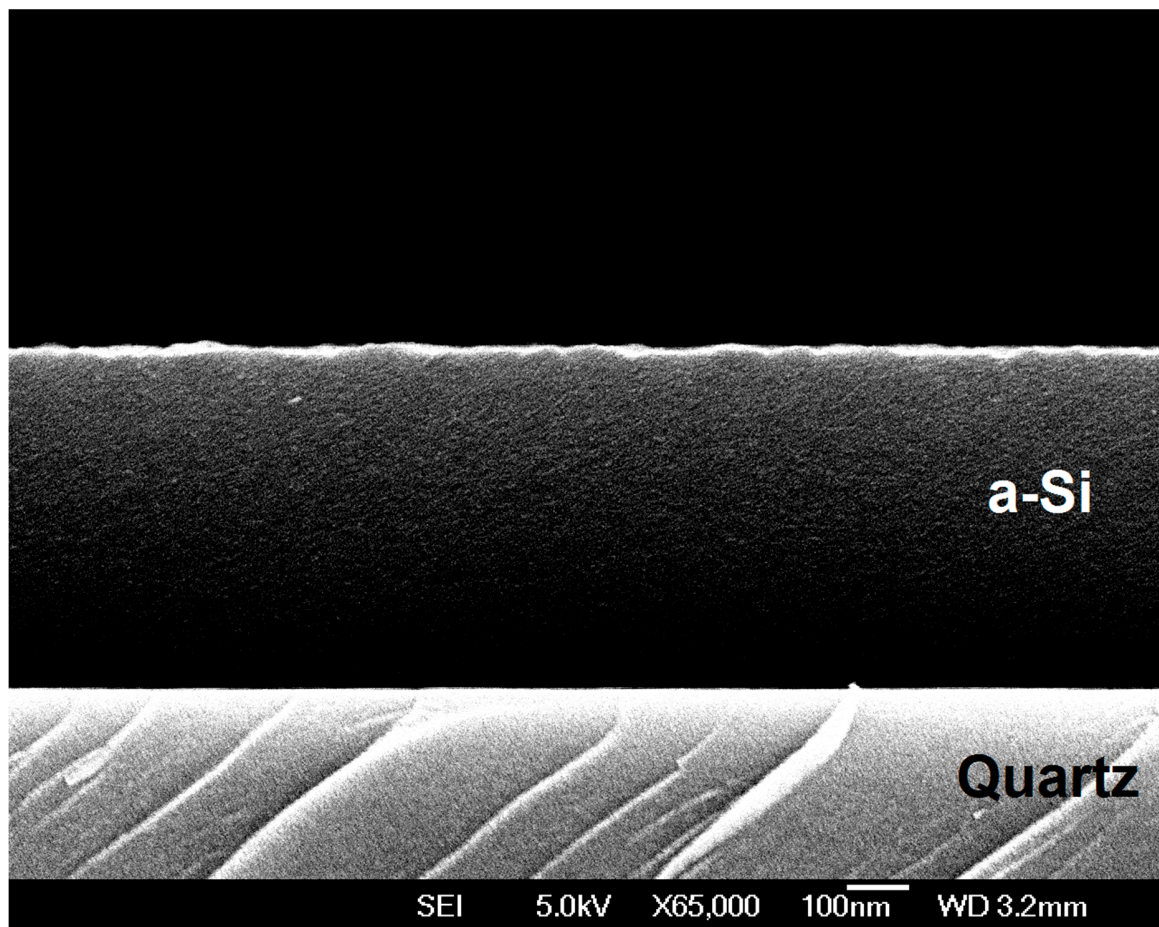

**Figure S1.** SEM Cross-section image of a-Si layer deposited at 350°C using PECVD on a quartz substrate. The thickness corresponds to a deposition time of 20 minutes.

#### **Silicon dioxide SiO<sub>2</sub>:**

Plasmlab system 100 PECVD (Plasma Enhanced Chemical Vapor Deposition) from Oxford Instruments was used to deposit SiO<sub>2</sub> layer using a gas mixture of SiH<sub>4</sub>, N<sub>2</sub>O and N<sub>2</sub> using a pre-established recipe in the system. The substrate temperature is 390°C. Fig S1 represents the cross-section image of a layer deposited for 15 minutes on a silicon wafer substrate. A thickness of about 900 nm is obtained. This corresponds to a deposition rate of approximately 1 nm/s for SiO<sub>2</sub>.

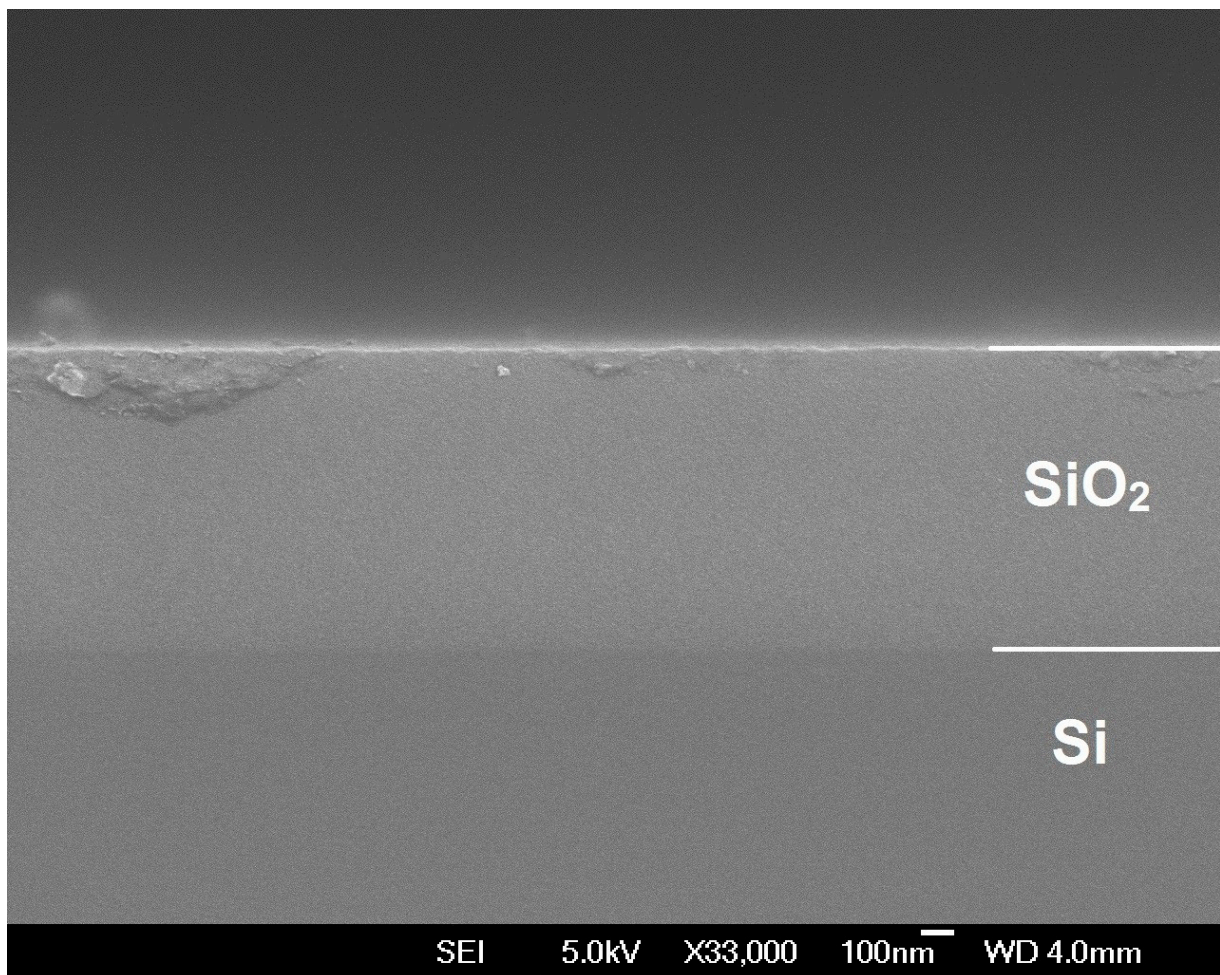

**Figure S2.** SEM Cross-section image of SiO<sub>2</sub> layer deposited at 390°C using PECVD on a silicon wafer. The thickness corresponds to a deposition time of 15 minutes.

### Vanadium dioxide VO<sub>2</sub>:

VO<sub>2</sub> film was deposited on a silicon wafer using a KrF excimer pulsed laser ( $\lambda = 248$  nm, laser fluence equal to  $1.8 \text{ J.cm}^{-2}$ ) focused on Vanadium target (99.9% pure) under 5 mTorr of oxygen ambient. The laser was pulsed at a frequency of 2 Hz. To establish the deposition rate accurately, the process was performed at room temperature (substrate temperature at 20 to 25°C). the deposition time was set at 5 hours (i.e., 36000 pulses). Figure S3 represents the cross-section image of the layer. A thickness of about 200 nm is obtained. This corresponds to a deposition rate of approximately 0.01 nm/s for VO<sub>2</sub>.

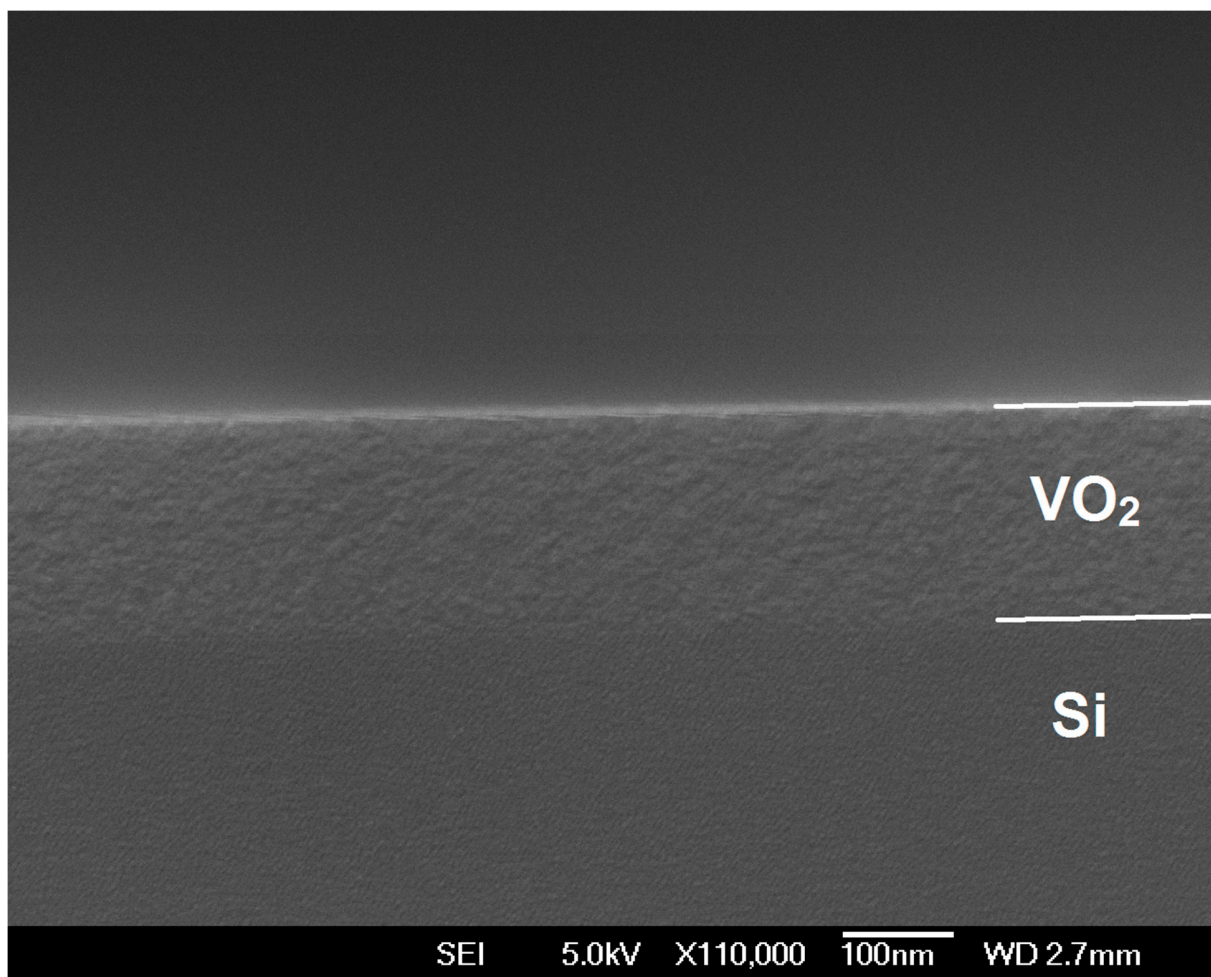

**Figure S3.** SEM Cross-section image of VO<sub>2</sub> layer deposited at room temperature using Pulsed Laser Deposition on a silicon wafer. The thickness corresponds to a deposition time of 5 hours.
